# Supplementary material for: Silibinin suppresses EMT-driven erlotinib resistance by reversing the high miR-21/low miR-200c signature in vivo
Source: Springer Nature journal article supplement (doi:10.1038/srep02459), 2013-08-21
Supplement: 41598_2013_BFsrep02459_MOESM1_ESM.pdf [file 41598_2013_BFsrep02459_MOESM1_ESM.pdf]

# **Silibinin suppresses EMT-driven erlotinib resistance by reversing the high *miR-21*/low *miR-200c* signature *in vivo***

Sílvia Cufí<sup>1,2a</sup>, Rosa Bonavia<sup>3a</sup>, Alejandro Vazquez-Martin<sup>1,2a</sup>, Cristina Oliveras-Ferraros<sup>1,2</sup>,  
Bruna Corominas-Faja<sup>1,2</sup>, Elisabet Cuyàs<sup>1,2</sup>, Begoña Martin-Castillo<sup>2,5</sup>, Enrique Barrajon-Catalán<sup>6,7</sup>, Joana Visa<sup>4</sup>, ç  
Antonio Segura-Carretero<sup>8,9</sup>, Jorge Joven<sup>10</sup>, Joaquim Bosch-Barrera<sup>2,4\*</sup>, Vicente Micol<sup>6,7\*</sup>, Javier A. Menendez<sup>1,2\*</sup>

<sup>a</sup>These authors contributed equally to this work

\*Co-senior authors

<sup>1</sup>Metabolism & Cancer Group, Translational Research Laboratory, Catalan Institute of Oncology, Girona, Catalonia (Spain); <sup>2</sup>Girona Biomedical Research Institute (IDIBGi), Girona, Catalonia (Spain); <sup>3</sup>Animal Care Facility, IDIBELL, L'Hospitalet de Llobregat, Barcelona, Catalonia (Spain); <sup>4</sup>Medical Oncology, Catalan Institute of Oncology, Girona, Catalonia (Spain); <sup>5</sup>Unit of Clinical Research, Catalan Institute of Oncology, Girona, Catalonia (Spain); <sup>6</sup>Molecular and Cellular Biology Institute (IBMC), Miguel Hernández University, Elche, Alicante (Spain); <sup>7</sup>Monteloeder, Inc., Elche, Alicante (Spain); <sup>8</sup>Unitat de Recerca Biomèdica (URB-CRB), Institut d'Investigació Sanitària Pere i Virgili (IISPV), Universitat Rovira i Virgili, Reus, Catalonia (Spain); <sup>9</sup>Department of Analytical Chemistry, Faculty of Sciences, University of Granada, Granada, Spain.

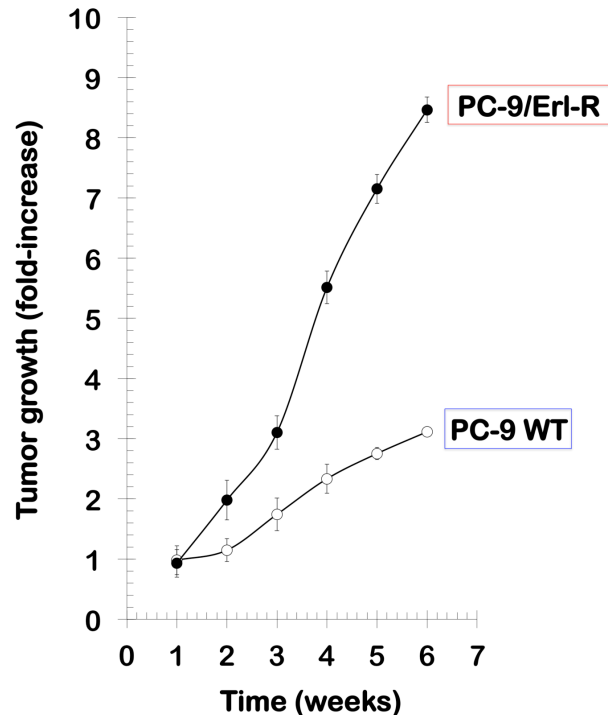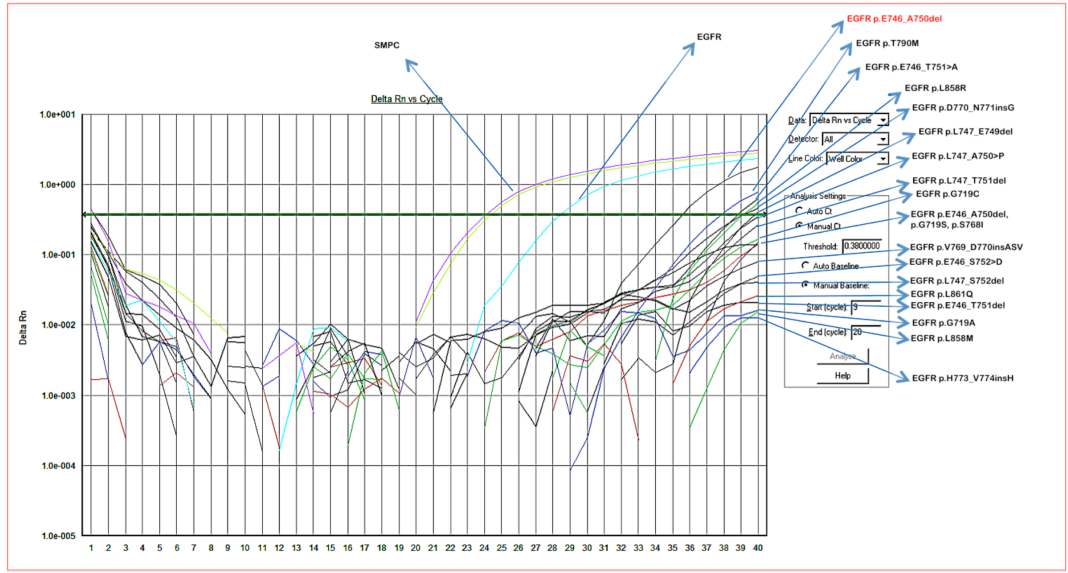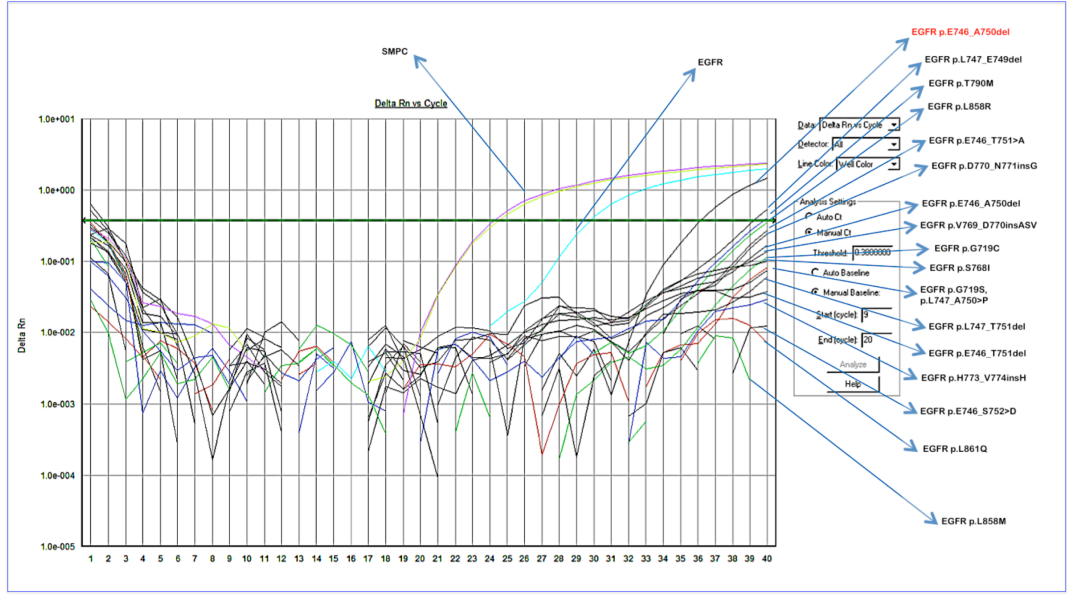

Supplementary Figure 1. Tumor growth (*left*) and mutational analysis of the *EGFR* gene (*right*) in erlotinib-responsive PC-9 (WT) parental cells and erlotinib-refractory PC-9/Erl-R derivatives.
